# Supplementary material for: An Untargeted Metabolomics Approach to Investigate the Metabolic Modulations of HepG2 Cells Exposed to Low Doses of Bisphenol A and 17β-Estradiol
Source: Front Endocrinol (Lausanne). 2018 Sep 25;9:571. doi: 10.3389/fendo.2018.00571 (PMC6167423; doi:10.3389/fendo.2018.00571)
Supplement: Supplementary file 2 [file Table_2.xlsx]

## Sheet: Legend
Supplemental Table 2.
Metabolic and reactions lists corresponding to the metabolic pathways modulated by E2 10-9 M exposure.

## Sheet: metabolites
	names	identifers in Recon2	names in supplemental figure 2
*	2-aminoacrylic acid	M_2amac
	4-hydroxy-2-oxoglutarate(2-)	M_4h2oglt	4-hydroxy-2-oxoglutarate
	5-hydroxy-L-tryptophan	M_5htrp	5-hydroxy-L-tryptophan
	S-adenosyl-L-homocysteine	M_ahcys	S-adenosyl-L-homocysteine
*	2-oxoglutarate(2-)	M_akg
	L-alanine	M_ala_L	L-alanine
	L-ascorbate	M_ascb_L	L-ascorbate
	L-asparagine	M_asn_L	L-asparagine
*	choline	M_chol
*	choline phosphate(1-)	M_cholp
*	coenzyme A(4-)	M_coa
*	CTP(4-)	M_ctp
	L-cysteine	M_cys_L	L-cysteine
	diglyceride	M_dag_hs	diglyceride
*	N6-(1,2-Dicarboxyethyl)-AMP	M_dcamp
*	dCDP(3-)	M_dcdp
	6,7-dihydrobiopterin	M_dhbpt	6,7-dihydrobiopterin
	dehydroascorbide(1-)	M_dhdascb	dehydroascorbide
	7,8-Dihydrofolate	M_dhf	7,8-Dihydrofolate
	Dolichyl beta-D-glucosyl phosphate, human uterine homolog	M_dolglcp_U	Dolichyl beta-D-glucosyl phosphate
	Dolichyl phosphate D-mannose, human uterine homolog	M_dolmanp_U	Dolichyl phosphate D-mannose
	dolichyl phosphate(2-)	M_dolp_U	dolichyl phosphate
	phosphoethanolaminyl-mannosyl-glucosylaminyl-acylphosphatidylinositol (H5)	M_emgacpail_hs	emgacpail
	etha[c]	M_etha	ethanolamine
	O-phosphonatoethanaminium(1-)	M_ethamp	O-phosphoethanolamine
	Flavin adenine dinucleotide oxidized	M_fad	fad
	FADH2(2-)	M_fadh2	fadh2
*	Fumarate	M_fum
	alpha-D-glucose 1-phosphate(2-)	M_g1p	D-glucose 1-phosphate
	D-Glucose 6-phosphate	M_g6p	D-Glucose 6-phosphate
	5-L-Glutamyl-L-alanine	M_gluala	5-L-Glutamyl-L-alanine
	glyoxylate	M_glx	glyoxylate
	Glycine	M_gly	Glycine
	(2S)-2-azaniumyl-4-{[(1R)-2-{[(2R)-2-[(4S)-4-azaniumyl-4-carboxylatobutanamido]-2-[(carboxylatomethyl)carbamoyl]ethyl]disulfanyl}-1-[(carboxylatomethyl)carbamoyl]ethyl]carbamoyl}butanoate	M_gthox	Oxidized glutathione
	Reduced glutathione	M_gthrd	Reduced glutathione
*	GTP	M_gtp
	mitoApo-ACP	M_HC02222	mitoApo-ACP
	iodide	M_i	iodide
*	L-cysteate(1-)	M_Lcyst
	L-cystine	M_Lcystin	L-cystine
	leukotriene C4(2-)	M_leuktrC4	leukotriene C4
	(trimannosyl),(phosphoethanolaminyl)-mannosyl-glucosaminyl-acylphosphatidylinositol (M4C)	M_m3emgacpail_hs	m3emgacpail
	5,10-Methylenetetrahydrofolate	M_mlthf	5,10-Methylenetetrahydrofolate
*	Nicotinamide adenine dinucleotide phosphate - reduced	M_nadph
	Norepinephrine	M_nrpphr	Norepinephrine
*	O2	M_o2
	phosphatidylethanolamine	M_pe_hs	phosphatidylethanolamine
*	Phosphoenolpyruvate	M_pep
*	O-Phospho-L-serine	M_pser_L
	sarcosine	M_sarcs	sarcosine
	serotonin(1+)	M_srtn	serotonin
	5,6,7,8-tetrahydrobiopterin	M_thbpt	5,6,7,8-tetrahydrobiopterin
	4a-hydroxytetrahydrobiopterin	M_thbpt4acam	4a-hydroxytetrahydrobiopterin
	(6S)-5,6,7,8-tetrahydrofolate(2-)	M_thf	(6S)-5,6,7,8-tetrahydrofolate
	L-tyrosine	M_tyr_L	L-tyrosine
	[(2R,3S,4R,5R)-5-(2,4-dioxo-1,2,3,4-tetrahydropyrimidin-1-yl)-3,4-dihydroxyoxolan-2-yl]methyl {[(3R,4S,5S,6R)-3,4,5-trihydroxy-6-(hydroxymethyl)oxan-2-yl phosphonato]oxy}phosphonate	M_udpg	uridine diphosphate glucose
	Urate	M_urate	Urate
	Urea	M_urea	Urea
*	filterd out, not shown in figure

## Sheet: reactions
	names	identifers in Recon2	equations
*	2-Aminoacrylate sulfotransferase	R_2AMACSULT	1.0 2-aminoacrylic acid + 1.0 Nicotinamide adenine dinucleotide phosphate - reduced + 1.0 (2R,3S,4R,5R)-5-(6-amino-9H-purin-9-yl)-4-hydroxy-2-({[(sulfonatooxy)phosphinato]oxy}methyl)oxolan-3-yl phosphate -> 1.0 Nicotinamide adenine dinucleotide phosphate + 1.0 adenosine 3,5-bismonophosphate(4-) + 1.0 L-cysteate(1-)	Methionine and cysteine metabolism
	5-Hydroxy-L-tryptophan decarboxy-lyase	R_5HLTDL	1.0 proton + 1.0 5-hydroxy-L-tryptophan -> 1.0 CO2 + 1.0 serotonin(1+)	Tryptophan metabolism
*	adenylosuccinate lyase	R_ADSL1	1.0 N6-(1,2-Dicarboxyethyl)-AMP -> 1.0 AMP + 1.0 Fumarate	Nucleotide interconversion
*	adenylosuccinate synthase	R_ADSS	1.0 L-aspartate(1-) + 1.0 IMP(2-) + 1.0 GTP -> 1.0 hydrogenphosphate + 1.0 proton + 1.0 N6-(1,2-Dicarboxyethyl)-AMP + 1.0 GDP	Nucleotide interconversion
	alanine-glyoxylate transaminase (irreversible), mitochondrial	R_AGTim	1.0 glyoxylate + 1.0 L-alanine -> 1.0 Glycine + 1.0 pyruvate	Alanine and aspartate metabolism
*	alanine-glyoxylate transaminase (irreversible), (peroxisomal)	R_AGTix	1.0 glyoxylate + 1.0 L-alanine -> 1.0 Glycine + 1.0 pyruvate	Alanine and aspartate metabolism
*	asparagine synthase (glutamine-hydrolysing)	R_ASNS1	1.0 ATP(4-) + 1.0 H2O + 1.0 L-glutamine + 1.0 L-aspartate(1-) -> 1.0 proton + 1.0 L-glutamate(1-) + 1.0 AMP + 1.0 Diphosphate + 1.0 L-asparagine	Alanine and aspartate metabolism
*	aspartate transaminase	R_ASPTAm	1.0 L-aspartate(1-) + 1.0 2-oxoglutarate(2-) <-> 1.0 L-glutamate(1-) + 1.0 Oxaloacetate	Alanine and aspartate metabolism
*	4-Trimethylammoniobutanoate,2-oxoglutarate:oxygen oxidoreductase (3-hydroxylating)	R_BBHOX	1.0 4-(trimethylammonio)butanoate + 1.0 2-oxoglutarate(2-) + 1.0 O2 -> 1.0 CO2 + 1.0 succinate(2-) + 1.0 L-Carnitine	Lysine metabolism
*	choline phosphotransferase	R_CEPTC	1.0 CDPcholine + 1.0 diglyceride -> 1.0 CMP + 1.0 proton + 1.0 Phosphatidylcholine	Glycerophospholipid metabolism
	ethanolamine phosphotransferase	R_CEPTE	1.0 diglyceride + 1.0 CDP-ethanolamine(1-) -> 1.0 CMP + 1.0 phosphatidylethanolamine + 1.0 proton	Glycerophospholipid metabolism
*	Choline O-acetyltransferase	R_CHATn	1.0 choline + 1.0 acetyl-CoA(4-) <-> 1.0 coenzyme A(4-) + 1.0 acetylcholine	Glycerophospholipid metabolism
*	Choline kinase	R_CHOLK	1.0 ATP(4-) + 1.0 choline -> 1.0 choline phosphate(1-) + 1.0 ADP(3-) + 1.0 proton	Glycerophospholipid metabolism
*	methyltransferase COQ3	R_COQ3m	1.0 S-adenosyl-L-methionine + 1.0 2-decaprenyl-5-hydroxy-6-methoxy-3-methyl-1,4-benzoquinone -> 1.0 S-adenosyl-L-homocysteine + 1.0 ubiquinone-10 + 1.0 proton	Ubiquinone synthesis
	Glutathione:cystine oxidoreductase	R_CYSGLTH	1.0 Reduced glutathione + 1.0 L-cystine <-> 1.0 (2S)-2-azaniumyl-4-{[(1R)-2-{[(2R)-2-[(4S)-4-azaniumyl-4-carboxylatobutanamido]-2-[(carboxylatomethyl)carbamoyl]ethyl]disulfanyl}-1-[(carboxylatomethyl)carbamoyl]ethyl]carbamoyl}butanoate + 1.0 L-cysteine	Methionine and cysteine metabolism
*	L-Cystine Lysteine-lyase (deaminating)	R_CYSLYSL	1.0 L-cystine + 1.0 H2O -> 1.0 pyruvate + 1.0 ammonium + 1.0 3-disulfanyl-L-alanine	Methionine and cysteine metabolism
*	cysteine transaminase	R_CYSTA	1.0 L-cysteine + 1.0 2-oxoglutarate(2-) <-> 1.0 L-glutamate(1-) + 1.0 3-mercaptopyruvate	Methionine and cysteine metabolism
*	cytidylate kinase (dCMP,CTP),nuclear	R_CYTK3n	1.0 dCMP + 1.0 CTP(4-) <-> 1.0 dCDP(3-) + 1.0 CDP(3-)	Nucleotide interconversion
*	D-3-Amino-isobutanoate:pyruvate aminotransferase, mitochondrial	R_D3AIBTm	1.0 D-3-Amino-isobutanoate + 1.0 pyruvate <-> 1.0 L-alanine + 1.0 2-methyl-3-oxopropanoate	Pyrimidine catabolism
	2-dehydro-3-deoxy-phosphogluconate aldolase, mitochondrial	R_DDPGAm	1.0 4-hydroxy-2-oxoglutarate(2-) <-> 1.0 pyruvate + 1.0 glyoxylate	Arginine and Proline Metabolism
	6,7-dihydropteridine reduction	R_DHPR2	1.0 6,7-dihydrobiopterin + 1.0 5-Methyltetrahydrofolate -> 1.0 5,10-Methylenetetrahydrofolate + 1.0 proton + 1.0 5,6,7,8-tetrahydrobiopterin	Tetrahydrobiopterin metabolism
*	Dolichol kinase, human (uterus)	R_DOLK_U	1.0 Dolichol, human uterine homolog + 1.0 CTP(4-) -> 1.0 dolichyl phosphate(2-) + 1.0 proton + 1.0 CDP(3-)	N-glycan synthesis
	dolichol phosphate flippase (uterus)	R_DOLP_Uter	1.0 (alpha-D-Mannosyl)8-beta-D-mannosyl-diacetylchitobiosyldiphosphodolichol, human uterine homolog + 1.0 Dolichyl beta-D-glucosyl phosphate, human uterine homolog -> 1.0 alpha-D-Glucosyl-(alpha-D-mannosyl)8-beta-D-mannosyl-diacetylchitobiosyldiphosphodolichol, human uterine homolog + 1.0 dolichyl phosphate(2-) + 1.0 proton	N-glycan synthesis
	dolichyl-phosphate-glucose-glycolipid alpha-glucosyltransferase (uterus)	R_DOLPGT1_Uer	1.0 alpha-D-Glucosyl-(alpha-D-mannosyl)8-beta-D-mannosyl-diacetylchitobiosyldiphosphodolichol, human uterine homolog + 1.0 Dolichyl beta-D-glucosyl phosphate, human uterine homolog -> 1.0 (alpha-D-Glucosyl)2-(alpha-D-mannosyl)8-beta-D-mannosyl-diacetylchitobiosyldiphosphodolichol, human uterine homolog + 1.0 dolichyl phosphate(2-) + 1.0 proton	N-glycan synthesis
	dolichyl-phosphate-mannose-glycolipid alpha-mannosyltransferase (uterus)	R_DOLPMT3_Uer	1.0 dolichyl phosphate(2-) + 1.0 GDP-alpha-D-mannose(2-) -> 1.0 GDP + 1.0 Dolichyl phosphate D-mannose, human uterine homolog	N-glycan synthesis
	dopamine beta-monooxygenase	R_DOPABMO	1.0 proton + 1.0 L-ascorbate + 1.0 O2 + 1.0 dopaminium(1+) -> 1.0 Norepinephrine + 1.0 dehydroascorbide(1-) + 1.0 H2O	Tyrosine metabolism
*	L-erythro-4-Hydroxyglutamate:2-oxoglutarate aminotransferase 2, mitochondrial	R_EHGLAT2m	1.0 Oxaloacetate + 1.0 erythro-4-hydroxy-L-glutamate(1-) -> 1.0 L-aspartate(1-) + 1.0 4-hydroxy-2-oxoglutarate(2-)	Arginine and Proline Metabolism
	Ethanolamine kinase	R_ETHAK	1.0 etha[c] + 1.0 ATP(4-) -> 1.0 proton + 1.0 O-phosphonatoethanaminium(1-) + 1.0 ADP(3-)	Glycerophospholipid metabolism
*	Complex II reaction for respiratory chain	R_FADH2ETC	1.0 FADH2(2-) + 1.0 ubiquinone-10 -> 1.0 Flavin adenine dinucleotide oxidized + 1.0 Ubiquinol-10	Oxidative phosphorylation
	Fe(III) reduction (ascorbate)	R_FE3R2e	1.0 L-ascorbate + 1.0 Fe3+ -> 1.0 dehydroascorbide(1-) + 1.0 proton + 1.0 Fe2+	Heme synthesis
*	folylpolyglutamate synthetase, mitochondrial	R_FPGSm	1.0 L-glutamate(1-) + 1.0 ATP(4-) + 1.0 (6S)-5,6,7,8-tetrahydrofolate(2-) -> 1.0 hydrogenphosphate + 1.0 ADP(3-) + 1.0 H2O + 1.0 pentaglutamyl folate (THF) + 1.0 proton	Folate metabolism
*	glucosamine-6-phosphate deaminase	R_G6PDA	1.0 H2O + 1.0 D-Glucosamine 6-phosphate -> 1.0 ammonium + 1.0 D-Fructose 6-phosphate	Aminosugar metabolism
	gamma-glutamylcyclotransferase	R_GGLUCT	1.0 5-L-Glutamyl-L-alanine -> 1.0 5-oxoprolinate + 1.0 L-alanine	Glutathione metabolism
	glycine hydroxymethyltransferase, reversible	R_GHMT2r	1.0 (6S)-5,6,7,8-tetrahydrofolate(2-) + 1.0 L-serine <-> 1.0 H2O + 1.0 Glycine + 1.0 5,10-Methylenetetrahydrofolate	Glycine, serine, alanine and threonine metabolism
	glycine oxidase, perixosomal	R_GLYOp	1.0 O2 + 1.0 Glycine + 1.0 H2O -> 1.0 glyoxylate + 1.0 ammonium + 1.0 Hydrogen peroxide	Glycine, serine, alanine and threonine metabolism
	glycine N-methyltransferase	R_GNMT	1.0 S-adenosyl-L-methionine + 1.0 Glycine -> 1.0 S-adenosyl-L-homocysteine + 1.0 proton + 1.0 sarcosine	Glycine, serine, alanine and threonine metabolism
	Glutathione dehydrogenase (dehydroascorbate reductase)	R_GTHDH	1.0 Reduced glutathione + 1.0 dehydroascorbide(1-) -> 1.0 proton + 1.0 L-ascorbate + 1.0 (2S)-2-azaniumyl-4-{[(1R)-2-{[(2R)-2-[(4S)-4-azaniumyl-4-carboxylatobutanamido]-2-[(carboxylatomethyl)carbamoyl]ethyl]disulfanyl}-1-[(carboxylatomethyl)carbamoyl]ethyl]carbamoyl}butanoate	Vitamin C metabolism
	glutathione peroxidase	R_GTHP	1.0 Reduced glutathione + 1.0 Hydrogen peroxide <-> 1.0 H2O + 1.0 (2S)-2-azaniumyl-4-{[(1R)-2-{[(2R)-2-[(4S)-4-azaniumyl-4-carboxylatobutanamido]-2-[(carboxylatomethyl)carbamoyl]ethyl]disulfanyl}-1-[(carboxylatomethyl)carbamoyl]ethyl]carbamoyl}butanoate	Glutathione metabolism
	glutathione synthetase	R_GTHS	1.0 Glycine + 1.0 ATP(4-) + 1.0 gamma-L-Glutamyl-L-cysteine -> 1.0 hydrogenphosphate + 1.0 proton + 1.0 Reduced glutathione + 1.0 ADP(3-)	Glutathione metabolism
	g-glutamyltransferase (e)	R_GTMLTe	1.0 L-alanine + 1.0 Reduced glutathione -> 1.0 5-L-Glutamyl-L-alanine + 1.0 L-cysteinylglycine	Glutathione metabolism
	H2 phosphoethanolaminyl transferase, endoplasmic reticulum	R_H2ETer	1.0 phosphatidylethanolamine + 1.0 mannosyl-glucosaminyl-acylphosphatidylinositiol (H2) -> 1.0 phosphoethanolaminyl-mannosyl-glucosylaminyl-acylphosphatidylinositol (H5) + 1.0 diglyceride	Phosphatidylinositol phosphate metabolism
	H5 mannosyltransferase, endoplasmic reticulum	R_H5MTer_U	1.0 phosphoethanolaminyl-mannosyl-glucosylaminyl-acylphosphatidylinositol (H5) + 1.0 Dolichyl phosphate D-mannose, human uterine homolog -> 1.0 dolichyl phosphate(2-) + 1.0 (mannosyl),(phosphoethanolaminyl)-mannosyl-glucosylaminyl-acylphosphatidylinositol (B) + 1.0 proton	Phosphatidylinositol phosphate metabolism
	H6 mannosyltransferase, endoplasmic reticulum	R_H6MTer_U	1.0 (dimannosyl),(phosphoethanolaminyl)-mannosyl-glucosylaminyl-acylphosphatidylinositol (H6) + 1.0 Dolichyl phosphate D-mannose, human uterine homolog -> 1.0 (trimannosyl),(phosphoethanolaminyl)-mannosyl-glucosaminyl-acylphosphatidylinositol (M4C) + 1.0 proton + 1.0 dolichyl phosphate(2-)	Phosphatidylinositol phosphate metabolism
*	Isocitrate dehydrogenase (NAD+)	R_ICDHxm	1.0 NAD(1-) + 1.0 isocitrate(3-) -> 1.0 2-oxoglutarate(2-) + 1.0 Nicotinamide adenine dinucleotide - reduced + 1.0 CO2	Citric acid cycle
	Iodide:hydrogen-peroxide oxidoreductase	R_IDHPOXOXb	1.0 Iodine + 1.0 L-tyrosine -> 1.0 proton + 1.0 iodide + 1.0 3-iodo-L-tyrosine	Tyrosine metabolism
*	D-Lactaldehyde:NAD+ oxidoreductase (glutathione-formylating)	R_LALDO	1.0 NAD(1-) + 1.0 Reduced glutathione + 1.0 (R)-lactaldehyde <-> 1.0 proton + 1.0 (R)-S-lactoylglutathionate(1-) + 1.0 Nicotinamide adenine dinucleotide - reduced	Pyruvate metabolism
*	L-Cysteate:2-oxoglutarate aminotransferase	R_LCYSTAT	1.0 L-cysteate(1-) + 1.0 2-oxoglutarate(2-) <-> 1.0 L-glutamate(1-) + 1.0 3-sulfonatopyruvate(2-)	Methionine and cysteine metabolism
	Leukotriene C4 carboxypeptidase	R_LTC4CP	1.0 H2O + 1.0 leukotriene C4(2-) <-> 1.0 Glycine + 1.0 leukotriene F4	Eicosanoid metabolism
*	Leukotriene C4 synthase	R_LTC4Sr	1.0 Reduced glutathione + 1.0 leukotriene A4(1-) -> 1.0 leukotriene C4(2-)	Eicosanoid metabolism
	M4C phosphoethanolaminyl transferase, endoplasmic reticulum	R_M4CET3er	1.0 phosphatidylethanolamine + 1.0 (trimannosyl),(phosphoethanolaminyl)-mannosyl-glucosaminyl-acylphosphatidylinositol (M4C) -> 1.0 diglyceride + 1.0 ({[(mannosyl),(phosphoethanolaminyl)]-dimannosyl},{phosphoethanolaminyl})-mannosyl-glucosaminyl-acylphosphatidylinositol (M4B)	Phosphatidylinositol phosphate metabolism
*	noradrenaline N-methyltransferase	R_NORANMT	1.0 S-adenosyl-L-methionine + 1.0 Norepinephrine -> 1.0 Adrenaline + 1.0 S-adenosyl-L-homocysteine + 1.0 proton	Tyrosine metabolism
*	pyrroline-5-carboxylate reductase	R_P5CR	1.0 proton + 1.0 1-Pyrroline-5-carboxylate + 1.0 Nicotinamide adenine dinucleotide phosphate - reduced -> 1.0 Nicotinamide adenine dinucleotide phosphate + 1.0 L-proline	Arginine and Proline Metabolism
*	glucose-6-phosphate isomerase	R_PGI	1.0 D-Glucose 6-phosphate <-> 1.0 D-Fructose 6-phosphate	Glycolysis/gluconeogenesis
	phosphoglucomutase	R_PGMT	1.0 alpha-D-glucose 1-phosphate(2-) <-> 1.0 D-Glucose 6-phosphate	Glycolysis/gluconeogenesis
	L-Phenylalanine,tetrahydrobiopterin:oxygen oxidoreductase (4-hydroxylating)	R_PHETHPTOX2	1.0 L-phenylalanine + 1.0 O2 + 1.0 5,6,7,8-tetrahydrobiopterin -> 1.0 4a-hydroxytetrahydrobiopterin + 1.0 L-tyrosine	Phenylalanine metabolism
*	phosphoserine transaminase	R_PSERT	1.0 3-phosphonatooxypyruvate(3-) + 1.0 L-glutamate(1-) -> 1.0 2-oxoglutarate(2-) + 1.0 O-Phospho-L-serine + 1.0 proton	Glycine, serine, alanine and threonine metabolism
*	phosphoserine phosphatase (L-serine)	R_PSP_L	1.0 H2O + 1.0 proton + 1.0 O-Phospho-L-serine -> 1.0 L-serine + 1.0 hydrogenphosphate	Glycine, serine, alanine and threonine metabolism
	NADPH:CoA-glutathione oxidoreductase EC:1.8.1.9	R_r0027	1.0 L-cysteine + 1.0 Nicotinamide adenine dinucleotide phosphate <-> 1.0 Nicotinamide adenine dinucleotide phosphate - reduced + 1.0 L-cystine + 1.0 proton	Methionine and cysteine metabolism
*	Carbon-dioxide:ammonia ligase (ADP-forming,carbamate-phosphorylating) Urea cycle and metabolism of amino groups / Nitrogen metabolism EC:6.3.4.16	R_r0034	1.0 ammonium + 1.0 CO2 + 1.0 ATP(4-) + 1.0 H2O <-> 1.0 carbamoyl phosphate(2-) + 1.0 proton + 1.0 ADP(3-) + 1.0 hydrogenphosphate	Urea cycle
*	L-Alanine:2-oxoglutarate aminotransferase Glutamate metabolism / Alanine and aspartate metabolism EC:2.6.1.2	R_r0081	1.0 L-alanine + 1.0 2-oxoglutarate(2-) <-> 1.0 L-glutamate(1-) + 1.0 pyruvate	Citric acid cycle
*	GTP:pyruvate O2-phosphotransferase Purine metabolism EC:2.7.1.40	R_r0122	1.0 Phosphoenolpyruvate + 1.0 proton + 1.0 GDP -> 1.0 pyruvate + 1.0 GTP	Glycolysis/gluconeogenesis
*	L-Asparagine amidohydrolase Alanine and aspartate metabolism / Cyanoamino acid metabolism / Nitrogen metabolism EC:3.5.1.1 EC:3.5.1.38	R_r0127	1.0 H2O + 1.0 L-asparagine -> 1.0 ammonium + 1.0 L-aspartate(1-)	Alanine and aspartate metabolism
*	gamma-glutamyltranspeptidase Glutathione metabolism EC:3.4.11.4	R_r0130	1.0 Reduced glutathione + 1.0 H2O <-> 1.0 L-glutamate(1-) + 1.0 L-cysteinylglycine	Glutathione metabolism
*	CTP:pyruvate O2-phosphotransferase EC:2.7.1.40	R_r0153	1.0 CDP(3-) + 1.0 proton + 1.0 Phosphoenolpyruvate -> 1.0 CTP(4-) + 1.0 pyruvate	Glycolysis/gluconeogenesis
*	L-Glutamine:pyruvate aminotransferase Glutamate metabolism EC:2.6.1.15	R_r0157	1.0 pyruvate + 1.0 L-glutamine -> 1.0 2-oxoglutaramate + 1.0 L-alanine	Urea cycle
*	Succinate-semialdehyde:NAD+ oxidoreductase Glutamate metabolism / Tyrosine metabolism / Butanoate metabolism EC:1.2.1.24 EC:1.2.1.16	R_r0178	1.0 Succinic semialdehyde + 1.0 H2O + 1.0 NAD(1-) <-> 1.0 proton + 1.0 Nicotinamide adenine dinucleotide - reduced + 1.0 succinate(2-)	Glutamate metabolism
*	Succinate-semialdehyde:NADP+ oxidoreductase Glutamate metabolism / Tyrosine metabolism / Butanoate metabolism EC:1.2.1.16	R_r0179	1.0 H2O + 1.0 Nicotinamide adenine dinucleotide phosphate + 1.0 Succinic semialdehyde <-> 1.0 Nicotinamide adenine dinucleotide phosphate - reduced + 1.0 proton + 1.0 succinate(2-)	Glutamate metabolism
*	Succinyl-CoA:glycine C-succinyl-transferase(decarboxylating) EC:2.3.1.37	R_r0196	1.0 Glycine + 1.0 Succinyl-CoA <-> 1.0 coenzyme A(4-) + 1.0 2-Amino-3-oxoadipate	Unassigned
*	L-Serine hydro-lyase (adding homocysteine) Glycine, serine and threonine metabolism EC:4.2.1.22	R_r0210	1.0 proton + 1.0 hydrosulfide + 1.0 L-serine -> 1.0 L-cysteine + 1.0 H2O	Methionine and cysteine metabolism
	5,6,7,8-Tetrahydrofolate:NAD+ oxidoreductase One carbon pool by folate EC:1.5.1.3	R_r0224	1.0 7,8-Dihydrofolate + 1.0 proton + 1.0 Nicotinamide adenine dinucleotide - reduced -> 1.0 NAD(1-) + 1.0 (6S)-5,6,7,8-tetrahydrofolate(2-)	Folate metabolism
*	Glycolysis / Glyconeogenesis EC:2.7.1.1	R_r0355	1.0 dATP + 1.0 D-glucose -> 1.0 D-Glucose 6-phosphate + 1.0 proton + 1.0 dADP(3-)	Glycolysis/gluconeogenesis
	NADPH:6,7-dihydropteridine oxidoreductase Folate biosynthesis EC:1.5.1.34	R_r0398	1.0 Nicotinamide adenine dinucleotide phosphate - reduced + 1.0 6,7-dihydrobiopterin + 1.0 proton <-> 1.0 5,6,7,8-tetrahydrobiopterin + 1.0 Nicotinamide adenine dinucleotide phosphate	Tetrahydrobiopterin metabolism
	L-Phenylalanine,tetrahydrobiopterin:oxygen oxidoreductase (4-hydroxylating) Phenylalanine, tyrosine and tryptophan biosynthesis EC:1.14.16.1	R_r0399	1.0 L-phenylalanine + 1.0 5,6,7,8-tetrahydrobiopterin + 1.0 O2 <-> 1.0 L-tyrosine + 1.0 H2O + 1.0 6,7-dihydrobiopterin	Tetrahydrobiopterin metabolism
	L-Tryptophan,tetrahydrobiopterin:oxygen oxidoreductase (5-hydroxylating) Tryptophan metabolism EC:1.14.16.4	R_r0403	1.0 5,6,7,8-tetrahydrobiopterin + 1.0 L-tryptophan + 1.0 O2 <-> 1.0 5-hydroxy-L-tryptophan + 1.0 H2O + 1.0 6,7-dihydrobiopterin	Tetrahydrobiopterin metabolism
	S-Adenosyl-L-methionine:ethanolamine-phosphate N-methyltransferase Glycerophospholipid metabolism EC:2.1.1.103	R_r0480	1.0 O-phosphonatoethanaminium(1-) + 1.0 S-adenosyl-L-methionine <-> 1.0 N-methylethanolaminium phosphate(1-) + 1.0 proton + 1.0 S-adenosyl-L-homocysteine	Glycerophospholipid metabolism
*	S-Adenosyl-L-methionine:phosphodimethylethanolamine N-methyltransferase Glycerophospholipid metabolism EC:2.1.1.103	R_r0789	1.0 Phosphodimethylethanolamine + 1.0 S-adenosyl-L-methionine <-> 1.0 S-adenosyl-L-homocysteine + 1.0 choline phosphate(1-)	Sphingolipid metabolism
	ACP Protein assembly	R_r1097	1.0 L-tyrosine + 1.0 L-threonine + 1.0 L-asparagine + 1.0 L-leucine + 1.0 L-lysinium(1+) + 1.0 L-aspartate(1-) + 1.0 Glycine + 1.0 L-methionine + 1.0 L-proline + 1.0 ATP(4-) + 1.0 L-glutamine + 1.0 L-cysteine + 1.0 L-isoleucine + 1.0 L-phenylalanine + 1.0 L-glutamate(1-) + 1.0 L-alanine + 1.0 H2O + 1.0 L-histidine + 1.0 L-valine + 1.0 L-argininium(1+) + 1.0 L-serine -> 1.0 Diphosphate + 1.0 mitoA…	Exchange/demand reaction
*	Protein degradation	R_r1341	1.0 ATP(4-) + 1.0 H2O + 1.0 ApoB100 -> 1.0 L-serine + 1.0 L-methionine + 1.0 L-valine + 1.0 L-leucine + 1.0 L-asparagine + 1.0 L-histidine + 1.0 L-tyrosine + 1.0 L-phenylalanine + 1.0 L-aspartate(1-) + 1.0 L-isoleucine + 1.0 hydrogenphosphate + 1.0 L-lysinium(1+) + 1.0 L-argininium(1+) + 1.0 L-tryptophan + 1.0 L-cysteine + 1.0 L-proline + 1.0 L-glutamine + 1.0 L-alanine + 1.0 L-glutamate(1-) + 1.…	Exchange/demand reaction
	Protein degradation	R_r1359	1.0 ATP(4-) + 1.0 H2O + 1.0 mitoApo-ACP -> 1.0 L-cysteine + 1.0 L-threonine + 1.0 L-argininium(1+) + 1.0 L-lysinium(1+) + 1.0 hydrogenphosphate + 1.0 L-serine + 1.0 L-glutamate(1-) + 1.0 L-glutamine + 1.0 ADP(3-) + 1.0 Glycine + 1.0 L-leucine + 1.0 L-alanine + 1.0 L-phenylalanine + 1.0 L-isoleucine + 1.0 L-valine + 1.0 L-asparagine + 1.0 L-proline + 1.0 L-tyrosine + 1.0 L-methionine + 1.0 L-aspar…	Exchange/demand reaction
*	RE1919	R_RE1919C	1.0 pyruvate + 1.0 dopaminium(1+) <-> 1.0 salsolinol 1-carboxylate + 1.0 H2O	Tyrosine metabolism
*	RE1978	R_RE1978C	1.0 H2O + 1.0 Anandamide <-> 1.0 etha[c] + 1.0 arachidonate	Eicosanoid metabolism
*	RE2032	R_RE2032M	1.0 L-asparagine + 1.0 acetyl-CoA(4-) <-> 1.0 coenzyme A(4-) + 1.0 N-acetyl-L-asparagine + 1.0 proton	Urea cycle
	RE2605	R_RE2605C	1.0 L-ascorbate + 1.0 urate radical <-> 1.0 monodehydroascorbate(1-) + 1.0 Urate	Purine catabolism
*	RE2644	R_RE2644C	1.0 H2O + 1.0 N-acetyl-L-asparagine <-> 1.0 L-asparagine + 1.0 acetate	Urea cycle
	RE2888	R_RE2888N	1.0 Urate + 1.0 Hydrogen peroxide <-> 1.0 Urea + 1.0 alloxan	Purine catabolism
*	RE2954	R_RE2954C	1.0 dTDP + 1.0 proton + 1.0 Phosphoenolpyruvate <-> 1.0 pyruvate + 1.0 dTTP	Pyrimidine synthesis
*	RE3066	R_RE3066X	1.0 3(S)-phytanoyl-CoA + 1.0 2-oxoglutarate(2-) + 1.0 O2 -> 1.0 succinate(2-) + 1.0 3(S)-2-hydroxyphytanoyl-CoA + 1.0 CO2	Fatty acid oxidation
*	RE3378	R_RE3378C	1.0 H2O + 1.0 1-alkyl 2-lysoglycerol 3-phosphocholine <-> 1.0 1-alkyl-sn-glycerol 3-phosphate(1-) + 1.0 choline	Glycerophospholipid metabolism
*	ribonucleoside-diphosphate reductase (CDP)	R_RNDR3	1.0 Reduced thioredoxin + 1.0 CDP(3-) -> 1.0 H2O + 1.0 Oxidized thioredoxin + 1.0 dCDP(3-)	Nucleotide interconversion
	Sarcosine dehydrogenase (m)	R_SARDHm	1.0 (6S)-5,6,7,8-tetrahydrofolate(2-) + 1.0 sarcosine + 1.0 Flavin adenine dinucleotide oxidized -> 1.0 5,10-Methylenetetrahydrofolate + 1.0 FADH2(2-) + 1.0 Glycine	Urea cycle
*	L-Serine hydro-lyase	R_SERHL	1.0 L-serine -> 1.0 2-aminoacrylic acid + 1.0 H2O	Glycine, serine, alanine and threonine metabolism
*	Acetyl-CoA:aralkylamine N-acetyltransferase	R_SRTNACT	1.0 serotonin(1+) + 1.0 acetyl-CoA(4-) -> 1.0 proton + 1.0 coenzyme A(4-) + 1.0 N-acetylserotonin	Tryptophan metabolism
*	succinate dehydrogenase	R_SUCD1m	1.0 Flavin adenine dinucleotide oxidized + 1.0 succinate(2-) <-> 1.0 Fumarate + 1.0 FADH2(2-)	Citric acid cycle
*	Succinate--CoA ligase (GDP-forming)	R_SUCOAS1m	1.0 coenzyme A(4-) + 1.0 GTP + 1.0 succinate(2-) <-> 1.0 GDP + 1.0 hydrogenphosphate + 1.0 Succinyl-CoA	Citric acid cycle
	Tetrahydrobiopterin-4a-carbinolamine dehydratase	R_THBPT4ACAMDASE	1.0 4a-hydroxytetrahydrobiopterin -> 1.0 H2O + 1.0 6,7-dihydrobiopterin	Tetrahydrobiopterin metabolism
*	thyroid peroxidase	R_THYPX	1.0 proton + 1.0 iodide + 1.0 Hydrogen peroxide -> 1.0 H2O + 1.0 Iodine	Tyrosine metabolism
	thymidylate synthase	R_TMDS	1.0 dUMP + 1.0 5,10-Methylenetetrahydrofolate -> 1.0 dTMP(2-) + 1.0 7,8-Dihydrofolate	Nucleotide interconversion
	tyrosine 3-monooxygenase	R_TYR3MO2	1.0 O2 + 1.0 5,6,7,8-tetrahydrobiopterin + 1.0 L-tyrosine -> 1.0 L-dopa + 1.0 4a-hydroxytetrahydrobiopterin	Tyrosine metabolism
*	tyrosine transaminase	R_TYRTA	1.0 2-oxoglutarate(2-) + 1.0 L-tyrosine <-> 1.0 3-(4-hydroxyphenyl)pyruvate + 1.0 L-glutamate(1-)	Tyrosine metabolism
*	tyrosine transaminase, mitochondrial	R_TYRTAm	1.0 L-tyrosine + 1.0 2-oxoglutarate(2-) <-> 1.0 L-glutamate(1-) + 1.0 3-(4-hydroxyphenyl)pyruvate	Tyrosine metabolism
	UDPglucose:dolichyl-phosphate beta-D-glucosyltransferase (uterus)	R_UDPDOLPT_U	1.0 dolichyl phosphate(2-) + 1.0 [(2R,3S,4R,5R)-5-(2,4-dioxo-1,2,3,4-tetrahydropyrimidin-1-yl)-3,4-dihydroxyoxolan-2-yl]methyl {[(3R,4S,5S,6R)-3,4,5-trihydroxy-6-(hydroxymethyl)oxan-2-yl phosphonato]oxy}phosphonate -> 1.0 UDP + 1.0 Dolichyl beta-D-glucosyl phosphate, human uterine homolog	N-glycan synthesis
	UDPglucose--hexose-1-phosphate uridylyltransferase	R_UGLT	1.0 [(2R,3S,4R,5R)-5-(2,4-dioxo-1,2,3,4-tetrahydropyrimidin-1-yl)-3,4-dihydroxyoxolan-2-yl]methyl {[(3R,4S,5S,6R)-3,4,5-trihydroxy-6-(hydroxymethyl)oxan-2-yl phosphonato]oxy}phosphonate + 1.0 (2R,3R,4S,5R,6R)-3,4,5-trihydroxy-6-(hydroxymethyl)oxan-2-yl phosphate <-> 1.0 UDP-D-galactose(2-) + 1.0 alpha-D-glucose 1-phosphate(2-)	Galactose metabolism
*	filterd out, not shown in figure
